# Supplementary material for: A Longitudinal Seroprevalence Study Evaluating Infection Control and Prevention Strategies at a Large Tertiary Care Center with Low COVID-19 Incidence
Source: MDPI journal article supplement (doi:10.3390/ijerph18084201), 2021-04-15
Supplement: s1 [file s1]

## Supplementary material

### Evaluation of infection control and prevention strategies, a longitudinal seroprevalence study at a large tertiary care center with low COVID-19 incidence.

Supplementary table S1 highlights the COVID-19 control strategies implemented by the Austrian government to reduce daily infection rate. COVID-19, Coronavirus Disease 19;

#### Implemented COVID-19 control strategies by the Austrian government initiated on March 16th

1. Access to public areas was restricted<sup>a</sup>
2. Stores were closed unless essential (pharmacies, grocery stores, etc.)<sup>b</sup>
3. Teaching operations on universities and schools were transitioned to home schooling and home office<sup>c</sup>
4. Prohibited entering of supermarkets or public transport without medical masks<sup>a</sup>
5. Restricted entrance into the country<sup>a</sup>

<sup>a</sup> Ongoing throughout the whole study period <sup>b</sup> Gradual loosening of control strategies, with opening of small stores (April 14th), larger stores and hairdressers (>400m<sup>2</sup>), opening of gastronomy (May 15th), hotels and fitness centers (May 29th). <sup>c</sup> Gradual loosening of restrictions in school and university from May 4<sup>th</sup> to June 3<sup>rd</sup>.

**Scheme 2.** highlights implemented infection prevention strategies at the General Hospital Vienna. Implemented measures were ongoing throughout the study period. COVID-19, Coronavirus Disease 19; HCWs, Health Care Workers; FFP, Filtering Face Piece; WHO, World Health Organization.

#### Implemented COVID-19 control strategies initiated on March 19th

1. Formation of distinct COVID-19 wards
2. Obligatory medical masks for all HCWs
3. Compulsory screening for patients admitted to our hospital
4. Personal protective equipment (consisting of FFP2 masks [FFP3 for aerosol generated procedures], goggles or face shields, long-sleeved water resistant gowns and a minimum of one pair of gloves) for HCWs in contact with COVID-19 patients
5. Quarantine for positively tested HCWs and HCWs with history of high-risk COVID-19 contact<sup>a</sup>
6. Hand hygiene according to recommendations of the WHO (23)

Supplementary table S3 summarizes the different wards participated at this study and highlights their distribution to Table 19. Coronavirus Disease 2019; OPD, outpatient department.

| <sup>b</sup> High-risk contact was defined as an unprotected contact to COVID-19 patients for a period of ≥15 minutes within ≤2 meters of range |              |               |                |                        |                       |                                |     |              |               |                   |                  |                |                 |               |            |           |           |        |         |
|-------------------------------------------------------------------------------------------------------------------------------------------------|--------------|---------------|----------------|------------------------|-----------------------|--------------------------------|-----|--------------|---------------|-------------------|------------------|----------------|-----------------|---------------|------------|-----------|-----------|--------|---------|
|                                                                                                                                                 | COVID-19 OPD | COVID-19 ward | COVID-19 D-ICU | Internal medicine ward | Internal medicine OPT | Operative (adult and children) | ICU | Surgical OPT | Surgical Ward | Neurological ward | Neurological OPT | Paediatric OPT | Paediatric ward | Dental clinic | Laboratory | Radiology | Pathology | Office | Overall |
| Physician                                                                                                                                       | 28           | 11            | 18             | 17                     | 21                    | 2                              | 9   | 19           | 13            | 4                 | 3                | 7              | 8               | 23            | 0          | 1         | 6         | 0      | 190     |
| Nurse                                                                                                                                           | 18           | 57            | 39             | 37                     | 13                    | 29                             | 11  | 25           | 8             | 2                 | 2                | 1              | 20              | 10            | 0          | 0         | 0         | 0      | 272     |
| Secretary                                                                                                                                       | 0            | 3             | 0              | 6                      | 7                     | 0                              | 0   | 5            | 0             | 0                 | 0                | 0              | 0               | 1             | 0          | 0         | 0         | 1      | 23      |
| Administrative staff                                                                                                                            | 4            | 4             | 6              | 6                      | 8                     | 0                              | 2   | 3            | 0             | 0                 | 0                | 0              | 1               | 0             | 0          | 0         | 0         | 0      | 34      |
| Student                                                                                                                                         | 5            | 2             | 2              | 5                      | 0                     | 0                              | 0   | 0            | 0             | 0                 | 0                | 0              | 0               | 0             | 1          | 0         | 0         | 0      | 15      |

|                    |              |               |              |             |     |             |     |     |             |             |     |     |             |     |             |             |             |             |     |
|--------------------|--------------|---------------|--------------|-------------|-----|-------------|-----|-----|-------------|-------------|-----|-----|-------------|-----|-------------|-------------|-------------|-------------|-----|
| voluntary worker   | 0            | 2             | 0            | 1           | 0   | 0           | 0   | 0   | 0           | 0           | 0   | 0   | 0           | 0   | 0           | 0           | 0           | 0           | 3   |
| MTA                | 1            | 0             | 0            | 1           | 2   | 0           | 0   | 7   | 0           | 0           | 0   | 0   | 1           | 0   | 0           | 5           | 8           | 0           | 25  |
| Physio-therapist   | 0            | 0             | 3            | 3           | 0   | 0           | 1   | 0   | 0           | 0           | 0   | 0   | 1           | 0   | 0           | 0           | 0           | 0           | 8   |
| Psy-cholo-gist     | 0            | 0             | 0            | 1           | 0   | 0           | 0   | 0   | 0           | 0           | 1   | 1   | 2           | 0   | 0           | 0           | 0           | 0           | 5   |
| non-clinical woker | 0            | 0             | 2            | 7           | 8   | 0           | 0   | 1   | 0           | 0           | 0   | 0   | 0           | 0   | 2           | 0           | 2           | 2           | 24  |
| not reported       | 0            | 0             | 0            | 2           | 0   | 0           | 0   | 0   | 0           | 0           | 0   | 0   | 0           | 0   | 0           | 0           | 0           | 0           | 2   |
| Over all           | 56           | 79            | 70           | 86          | 59  | 31          | 23  | 60  | 21          | 6           | 6   | 9   | 33          | 34  | 3           | 6           | 16          | 3           | 599 |
| Cohorts            | COVID-19 OPD | COVID-19 ward | COVID-19 ICU | Normal ward | OPD | Normal ward | ICU | OPD | Normal ward | Normal ward | OPD | OPD | Normal ward | OPD | Normal ward | Normal ward | Normal ward | Normal ward |     |

**Scheme 4.** highlights areas at risk for COVID-19 in March 2020.

| Country       | Areas                                                                                                                                                                                                    | start date |
|---------------|----------------------------------------------------------------------------------------------------------------------------------------------------------------------------------------------------------|------------|
| Egypt         | whole country                                                                                                                                                                                            | 05.03.2020 |
| China         | whole country                                                                                                                                                                                            | 04.01.2020 |
| South Korea   | whole country                                                                                                                                                                                            | 19.01.2020 |
| Iran          | whole country                                                                                                                                                                                            | 19.02.2020 |
| Japan         | whole country                                                                                                                                                                                            | 25.01.2020 |
| Singapore     | whole country                                                                                                                                                                                            | 23.01.2020 |
| USA           | Washington, New York and New Jersey                                                                                                                                                                      | 20.01.2020 |
| Italy         | whole country                                                                                                                                                                                            | 29.01.2020 |
| Great Britain | London                                                                                                                                                                                                   | 01.02.2020 |
| Spain         | Madrid, Navarre, La Rioja and Pais Vasco                                                                                                                                                                 | 10.03.2020 |
| Germany       | North Rhine-Westphalia                                                                                                                                                                                   | 28.01.2020 |
| France        | Grand Est and Ile-de-France                                                                                                                                                                              | 24.01.2020 |
| Switzerland   | Tessin, Waadt and Geneva                                                                                                                                                                                 | 24.02.2020 |
| Austria       | Tyrol (whole), Vorarlberg (Lech, Warth, Schröcken, Klösterl, Nenzing-Dorf and Beschling), Carinthia (Heiligenblut), Salzburg (Flachau, Bad Gastein, Bad Hofgastein, Dorfgastein, Großarl and Hüttschlag) | 26.02.2020 |

**Scheme 5.** highlights the odds for COVID-19 depending on symptoms.

| Symptom      | Tested negative | Tested positive | Odds ratio | 95% CI      | p value |
|--------------|-----------------|-----------------|------------|-------------|---------|
| Fever        | 7.1%            | 33.3%           | 6.57       | 1.17-36.92  | 0.033   |
| Headache     | 12.5%           | 33.3%           | 3.51       | 0.63-19.52  | 0.151   |
| Cough        | 12.0%           | 50.0%           | 7.37       | 1.46-37.20  | 0.016   |
| SoreThroat   | 14.3%           | 0.0%            |            |             |         |
| Sneezing     | 7.4%            | 0.0%            |            |             |         |
| BodyAches    | 5.9%            | 16.7%           | 3.19       | 0.36-28.09  | 0.295   |
| Sniffing     | 12.1%           | 66.7%           | 14.50      | 2.61-80.59  | 0.002   |
| Diarrhea     | 5.1%            | 16.7%           | 3.76       | 0.43-33.20  | 0.233   |
| ShortnBreath | 3.2%            | 16.7%           | 6.05       | 0.67-54.36  | 0.108   |
| Smell        | 1.9%            | 50.0%           | 53.00      | 9.61-292.41 | <0.001  |
| Fatigue      | 12.3%           | 50.0%           | 7.14       | 1.41-36.03  | 0.017   |

Supplementary table S6 comprises the different cohorts and highlights positive tested health care workers, COVID-19, Coronavirus Disease 19; ICU, intensive care unit.

| Working environment | Tested positive depending on working environment |
|---------------------|--------------------------------------------------|
| COVID-19 ICU (n=70) | - tested positive =1                             |
| ICU (n=29)          | - ICU – adults (n=23, tested positive 0)         |
|                     | - ICU – children (n=6, tested positive 0)        |

|                                              |                                                    |
|----------------------------------------------|----------------------------------------------------|
| <b>COVID-19 ward (n=79)</b>                  | - tested positive = 1                              |
|                                              | - Internal medicine (n=86, tested positive 1)      |
|                                              | - Surgical department (n=21, tested positive 0)    |
|                                              | - Operating room (n=31, tested positive 0)         |
| <b>Normal ward (n=199)</b>                   | - Neurological ward (n=6, tested positive 0)       |
|                                              | - Pathology department (n=16, tested positive 0)   |
|                                              | - Radiology department (n=6, tested positive 0)    |
|                                              | - Paediatric department (n=27, tested positive 0)  |
|                                              | - Office(n=3, tested positive 0)                   |
|                                              | - Laboratory (n=3, tested positive 0)              |
| <b>COVID-19 outpatient department (n=56)</b> | - tested positive=2                                |
|                                              | - Internal medicine (n=57, tested positive 0)      |
| <b>Outpatient department (n=166)</b>         | - Surgical department (n=60, tested positive 2)    |
|                                              | - Paediatric department (n=9, tested positive 0)   |
|                                              | - Dental clinic (n=34, tested positive 0)          |
|                                              | - Neurological department (n=6, tested positive 1) |

**Supplementary table S7 highlights risk factors assessed in our study.** Proportion is shown as n,(%). The different proportion of risk factors was further calculated by Fisher's exact probability tests. Significant differences ( $p<0.05$ ) were highlighted by \*.

| <b>Risk factors</b>            | <b>negatively tested HCW (n=591)</b> | <b>positively tested HCW (n=8)</b> | <b>p-value</b> |
|--------------------------------|--------------------------------------|------------------------------------|----------------|
| Working environment            | 201 (34%)                            | 4 (50%)                            | 0.455          |
| Unprotected contact            | 47 (8%)                              | 4 (50%)                            | 0.003*         |
| Unprotected contact in work    | 42 (7.1%)                            | 2 (25%)                            | 0.11           |
| Unprotected contact in leisure | 5 (0.8%)                             | 2 (25%)                            | 0.003*         |
| Family history                 |                                      |                                    |                |
| Family member in quarantine    | 30 (5%)                              | 2 (25%)                            | 0.06           |
| Family member tested positive  | 2 (0.3%)                             | 1 (12.5%)                          | 0.04*          |
| Travel history                 | 37 (6.3%)                            | 2 (25%)                            | 0.09           |
| Problems handling PPE          | 30 (5%)                              | 0                                  | 1              |

**Supplementary figures:**

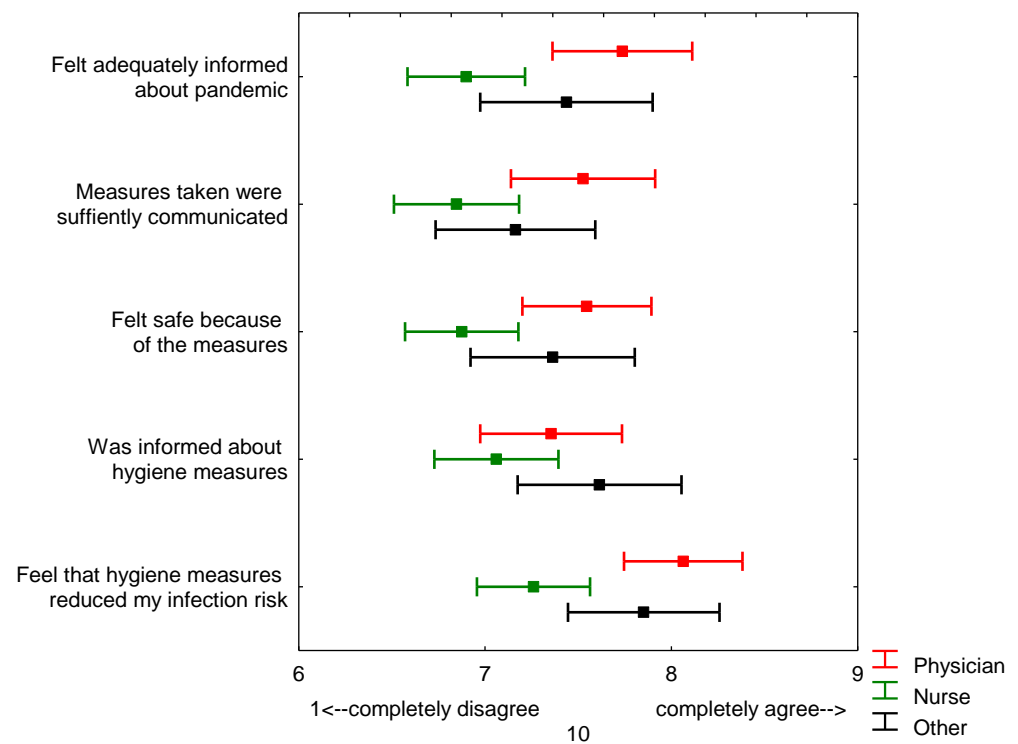

**Scheme 8.** demonstrates how the HCWs have experienced the epidemic at our center.

## Questionnaires (translated from German):

### Questionnaire: A cross-sectional study assessing SARS-CoV-2 seroprevalence at the Vienna General Hospital during COVID-19 epidemic.

A) Subject Code: \_\_\_\_\_

#### 1. Demographic parameters

- 1.1. Sex ☐ male ☐ female
- 1.2. Do you smoke? ☐ no ☐ yes ☐ former smoker
- 1.2.1. When have you started smoking? \_\_\_\_/\_\_\_\_/\_\_\_\_
- 1.2.2. When did you stop smoking? \_\_\_\_/\_\_\_\_/\_\_\_\_
- 1.2.3. How many cigarettes per day? \_\_\_\_\_cigarettes/day

#### 2. Risk profile

##### 2.1. Working environment

- 2.1.1. Outpatient wards  
☐ COVID-19 outpatient ward ☐ Other: \_\_\_\_\_
- 2.1.2. Inpatient wards  
☐ COVID-19 ward ☐ ward  
☐ COVID-19 intermediate care unit ☐ intermediate care unit  
☐ COVID-19 intensive care unit ☐ intensive care unit  
☐ ward for suspected COVID-19 cases ☐ day clinic  
☐ other: \_\_\_\_\_
- 2.1.3. Profession  
☐ Physician ☐ Nurse ☐ Administrative staff  
☐ Housekeeping ☐ Student ☐ Voluntary worker  
☐ Others: \_\_\_\_\_
- 2.1.4. Since when have you been working at the mentioned ward? (DD/MM/JJJJ) \_\_\_\_/\_\_\_\_/\_\_\_\_
- 2.1.5. Have you had contact to a COVID-19 patient? ☐ yes ☐ no
- 2.1.5.1. When did the first contact take place? (DD/MM/JJJJ) \_\_\_\_/\_\_\_\_/\_\_\_\_
- 2.1.6. How often have you had contact to a COVID-19 patient within the last two weeks?  
☐ none ☐ once ☐ once a week  
☐ 2-6 times per week ☐ once a day ☐ several times a day
- 2.1.7. Do you work at other wards as well?  
☐ COVID-19 ward ☐ Ward  
☐ COVID-19 intermediate care unit ☐ intermediate care unit  
☐ COVID-19 intensive care unit ☐ intensive care unit  
☐ ward for suspected COVID-19 cases ☐ day clinic  
☐ Other: \_\_\_\_\_

##### 2.2. Travel history

- 2.2.1. Have you been outside Austria within the last 6 months? ☐ yes ☐ no

2.2.1.1. If you answered question 2.2.1 with yes, please state where you have been to.

| Country | City | Date of arrival | Date of departure |
|---------|------|-----------------|-------------------|
|---------|------|-----------------|-------------------|

|          |       |       |       |
|----------|-------|-------|-------|
| 1) _____ | _____ | _____ | _____ |
|----------|-------|-------|-------|

|          |       |       |       |
|----------|-------|-------|-------|
| 2) _____ | _____ | _____ | _____ |
|----------|-------|-------|-------|

|          |       |       |       |
|----------|-------|-------|-------|
| 3) _____ | _____ | _____ | _____ |
|----------|-------|-------|-------|

2.2.2. Have you been outside Vienna within the last 6 weeks? ☐ yes ☐ no

2.2.2.1. If you answered question 2.2.2. with yes, please state where you have been to.

| Country | City | Date of arrival | Date of departure |
|---------|------|-----------------|-------------------|
|---------|------|-----------------|-------------------|

|          |       |       |       |
|----------|-------|-------|-------|
| 1) _____ | _____ | _____ | _____ |
|----------|-------|-------|-------|

|          |       |       |       |
|----------|-------|-------|-------|
| 2) _____ | _____ | _____ | _____ |
|----------|-------|-------|-------|

|          |       |       |       |
|----------|-------|-------|-------|
| 3) _____ | _____ | _____ | _____ |
|----------|-------|-------|-------|

### 2.3. Living condition

2.3.1. Do you live in Vienna? ☐ yes ☐ no

2.3.1.1. If you answered question 2.3.1. with no, please state where you live.

☐ Lower Austria ☐ Burgenland ☐ Upper Austria

☐ Styria ☐ Carinthia ☐ Tyrol

☐ Salzburg ☐ Vorarlberg

City/Town: \_\_\_\_\_

2.3.2. With how many people do you live in the same household? \_\_\_\_\_Number

2.3.3. How many children under 10 years live with you? \_\_\_\_\_Number

2.3.4. How many children above 10 years live with you? \_\_\_\_\_Number

2.3.5. How many adults above 65 years live with you? \_\_\_\_\_Number

2.3.6. Did one of your roommates have to go in to quarantine? ☐ yes ☐ no

2.3.6.1. Did the person in quarantine report symptoms? ☐ yes ☐ no

2.3.6.2. Was the person in quarantine positively tested for SARS-CoV-2? ☐ yes ☐ no

2.3.6.3. How often have you had contact to the person in quarantine?

☐ once ☐ once a week ☐ 2-6 times per week

☐ once a day ☐ several times per day

2.3.7. Have you had contact to COVID-19 outside of your family or work? ☐ yes ☐ no

2.3.7.1. When did the COVID-19 contact take place? (DD/MM/YYYY) \_\_\_\_/\_\_\_\_/\_\_\_\_

2.3.8. How do you get to work? (please add percentage if more than one mean of transport is used)

☐ Tram \_\_\_\_\_% ☐ Subway \_\_\_\_\_% ☐ Car/Motorcycle \_\_\_\_\_%

☐ Train \_\_\_\_\_% ☐ Bus \_\_\_\_\_% ☐ Bicycle \_\_\_\_\_%

☐ By foot \_\_\_\_\_% ☐ Others: \_\_\_\_\_%

### 3. Personal protective equipment

3.1. Personal protective equipment during work in contact with COVID-19 patients

3.1.1. Have you been protected by personal protective equipment during COVID-19 contact? (Personal protective equipment consisting of FFP2 masks [FFP3 for aerosol generated procedures], goggles or face shields, long-sleeved water resistant gowns and a minimum of one pair of gloves)

☐ always (~100%)      ☐ often (~80%)      ☐ sometimes (~50%)      ☐ never

3.1.2. If not protected according to point 3.1.1., how were you protected during COVID-19 contact? (please select all options that apply)

☐ goggles/face shield      ☐ long-sleeved water-resistant gown  
☐ gloves      ☐ FFP 2 masks  
☐ others: \_\_\_\_\_

### 3.2. Personal protective equipment during leisure time in contact with COVID-19 patients

3.2.1. How often have you been protected by personal protective equipment during COVID-19 contact in leisure time?

☐ always (~100%)      ☐ often (~80%)      ☐ sometimes (~50%)      ☐ never

3.2.2. How were you protected during COVID-19 contact in leisure time? (please select all options that apply)

☐ Gloves      ☐ FFP2 masks  
☐ Others: \_\_\_\_\_

3.3. Have you had problems in handling the personal protective equipment?      ☐ yes      ☐ no

3.3.1. If you have reported problems in handling personal protective equipment, please specify the kind of problems that have occurred:

---



---



---

3.4. How much does the following statement apply? (1 does not apply, 10 applies fully)

|                                                   | 1                        | 2                        | 3                        | 4                        | 5                        | 6                        | 7                        | 8                        | 9                        | 10                       |
|---------------------------------------------------|--------------------------|--------------------------|--------------------------|--------------------------|--------------------------|--------------------------|--------------------------|--------------------------|--------------------------|--------------------------|
| I felt protected by personal protective equipment | <input type="checkbox"/> |

3.5. Have you had unprotected contact to a COVID-19 positive individual?      ☐ yes      ☐ no

3.5.1. Where did the unprotected contact to a COVID-19-positive individual take place?

☐ Work      ☐ Leisure time      ☐ Work and leisure time

## 4. Quarantine

4.1. Have you had to go into quarantine?      ☐ yes      ☐ no

4.1.2. If you had to go into quarantine, please state the date and reason for said quarantine.

|               | <b>Start date</b> | <b>End date</b> | <b>Reason</b>                                                                                                                                                                 |
|---------------|-------------------|-----------------|-------------------------------------------------------------------------------------------------------------------------------------------------------------------------------|
| 1. Quarantine | ___/___/___       | ___/___/___     | <input type="checkbox"/> Stay in a risk-area<br><input type="checkbox"/> Contact to COVID-19-positive individual<br><input type="checkbox"/> COVID-19 disease<br>Other: _____ |
| 2. Quarantine | ___/___/___       | ___/___/___     | <input type="checkbox"/> Stay in a risk-area<br><input type="checkbox"/> Contact to COVID-19-positive individual<br><input type="checkbox"/> COVID-19 disease<br>Other: _____ |

## 5. History of SARS-CoV-2 tests

5.1. Have you been tested for SARS-CoV-2?

☐ yes ☐ no

5.1.1. When did you get tested for SARS-CoV-2 and what was the result?

| Tests    | Date (DD/MM/YYYY) | Result (positive/negative) |
|----------|-------------------|----------------------------|
| 1. Test  | ___/___/___       | _____                      |
| 2. Test  | ___/___/___       | _____                      |
| 3. Test  | ___/___/___       | _____                      |
| 4. Test  | ___/___/___       | _____                      |
| 5. Test  | ___/___/___       | _____                      |
| 6. Test  | ___/___/___       | _____                      |
| 7. Test  | ___/___/___       | _____                      |
| 8. Test  | ___/___/___       | _____                      |
| 9. Test  | ___/___/___       | _____                      |
| 10. Test | ___/___/___       | _____                      |

## 6. Symptoms

6.1. Have you been ill since 25.02.2020?

☐ yes ☐ no

6.2. If you answered 6.1. with yes, please answer the following questions.

6.2.1. First episode of illness:

6.2.1.1 When did the symptoms start? (DD/MM/JJJJ)

\_\_\_/\_\_\_/\_\_\_

6.2.1.2. When did the symptoms end? (DD/MM/JJJJ)

\_\_\_/\_\_\_/\_\_\_

6.2.1.3. What kind of symptoms did you experience?

- |                                   |                                              |                                                   |                                      |
|-----------------------------------|----------------------------------------------|---------------------------------------------------|--------------------------------------|
| <input type="checkbox"/> Fever    | <input type="checkbox"/> Headache            | <input type="checkbox"/> Cough                    | <input type="checkbox"/> Sore throat |
| <input type="checkbox"/> Sneezing | <input type="checkbox"/> Limb pain           | <input type="checkbox"/> Congestion or runny nose | <input type="checkbox"/> Diarrhoea   |
| <input type="checkbox"/> Fatigue  | <input type="checkbox"/> Shortness of breath | <input type="checkbox"/> Altered taste or smell   |                                      |



☐ Other: \_\_\_\_\_

### 6.2.2. Second episode of illness:

6.2.2.1 When did the symptoms start? (DD/MM/JJJJ)      \_\_/\_\_/\_\_\_\_

6.2.2.2. When did the symptoms end? (DD/MM/JJJJ)      \_\_/\_\_/\_\_\_\_

6.2.2.3. What kind of symptoms did you experience?

☐ Fever      ☐ Headache      ☐ Cough      ☐ Sore throat

☐ Sneezing      ☐ Limb pain      ☐ Congestion or runny nose      ☐ Diarrhoea

☐ Fatigue      ☐ Shortness of breath      ☐ Altered taste or smell

☐ Other: \_\_\_\_\_

## 7. Experience of the COVID-19 epidemic at the General Hospital Vienna

How much does the following statement apply? (1 does not apply, 10 applies fully)

[illegible]
